# Supplementary material
Source: Springer Nature journal article supplement (https://www.springermedizin.de/resource/supplementary/13053_2009_143_MOESM2_ESM.pdf/9674286)

Box Plot of multiple variables grouped by 10:1. dr risk  
 Sheet1 in nyaste version\_090509.stw 28v\*215c  
 Mean; Box: Mean±SE; Whisker: Mean±0.95 Conf. Interval

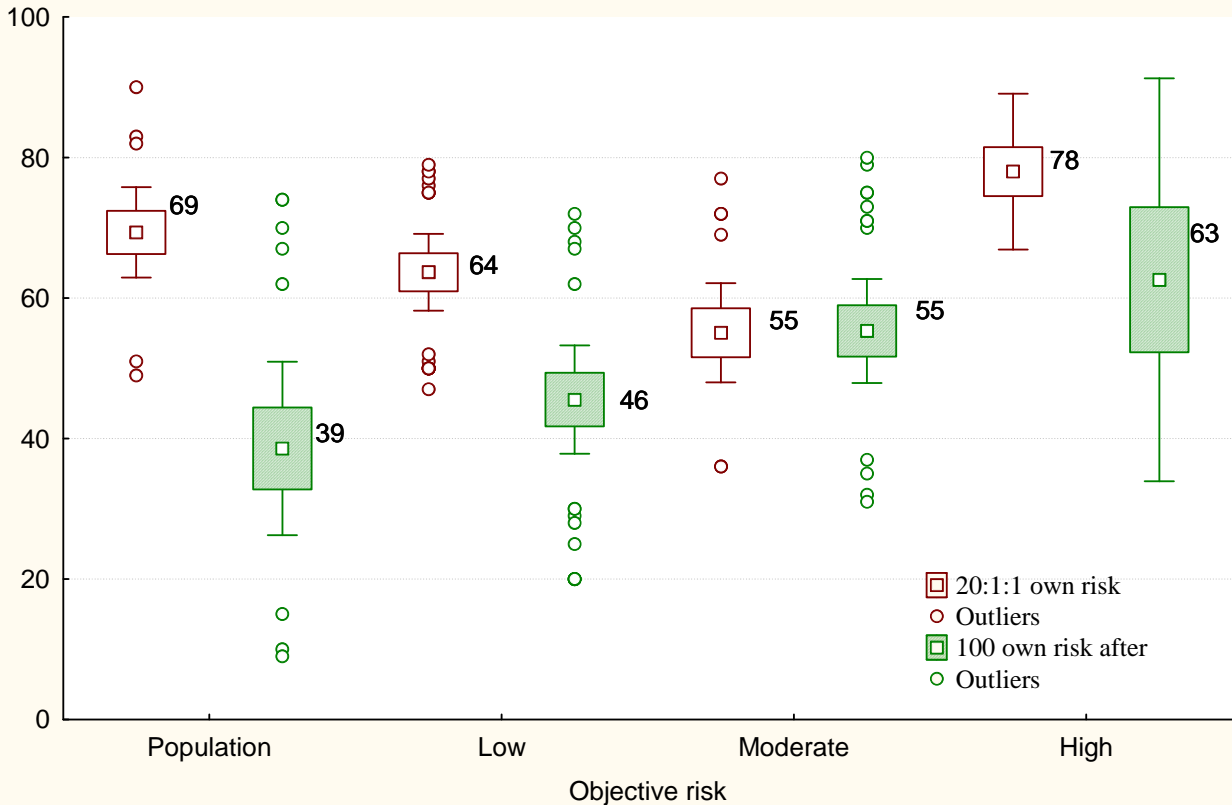

Supplement: MOESM2 [file 9674286]
